# Supplementary material for: Tyrosine 192 within the SH2 domain of the Src-protein tyrosine kinase p56Lck regulates T-cell activation independently of Lck/CD45 interactions
Source: PubMed Central journal article supplement (PMC7682018; doi:10.1186/s12964-020-00673-z), 2020-11-23

# Supplementary Figures

**Fig. S1:**

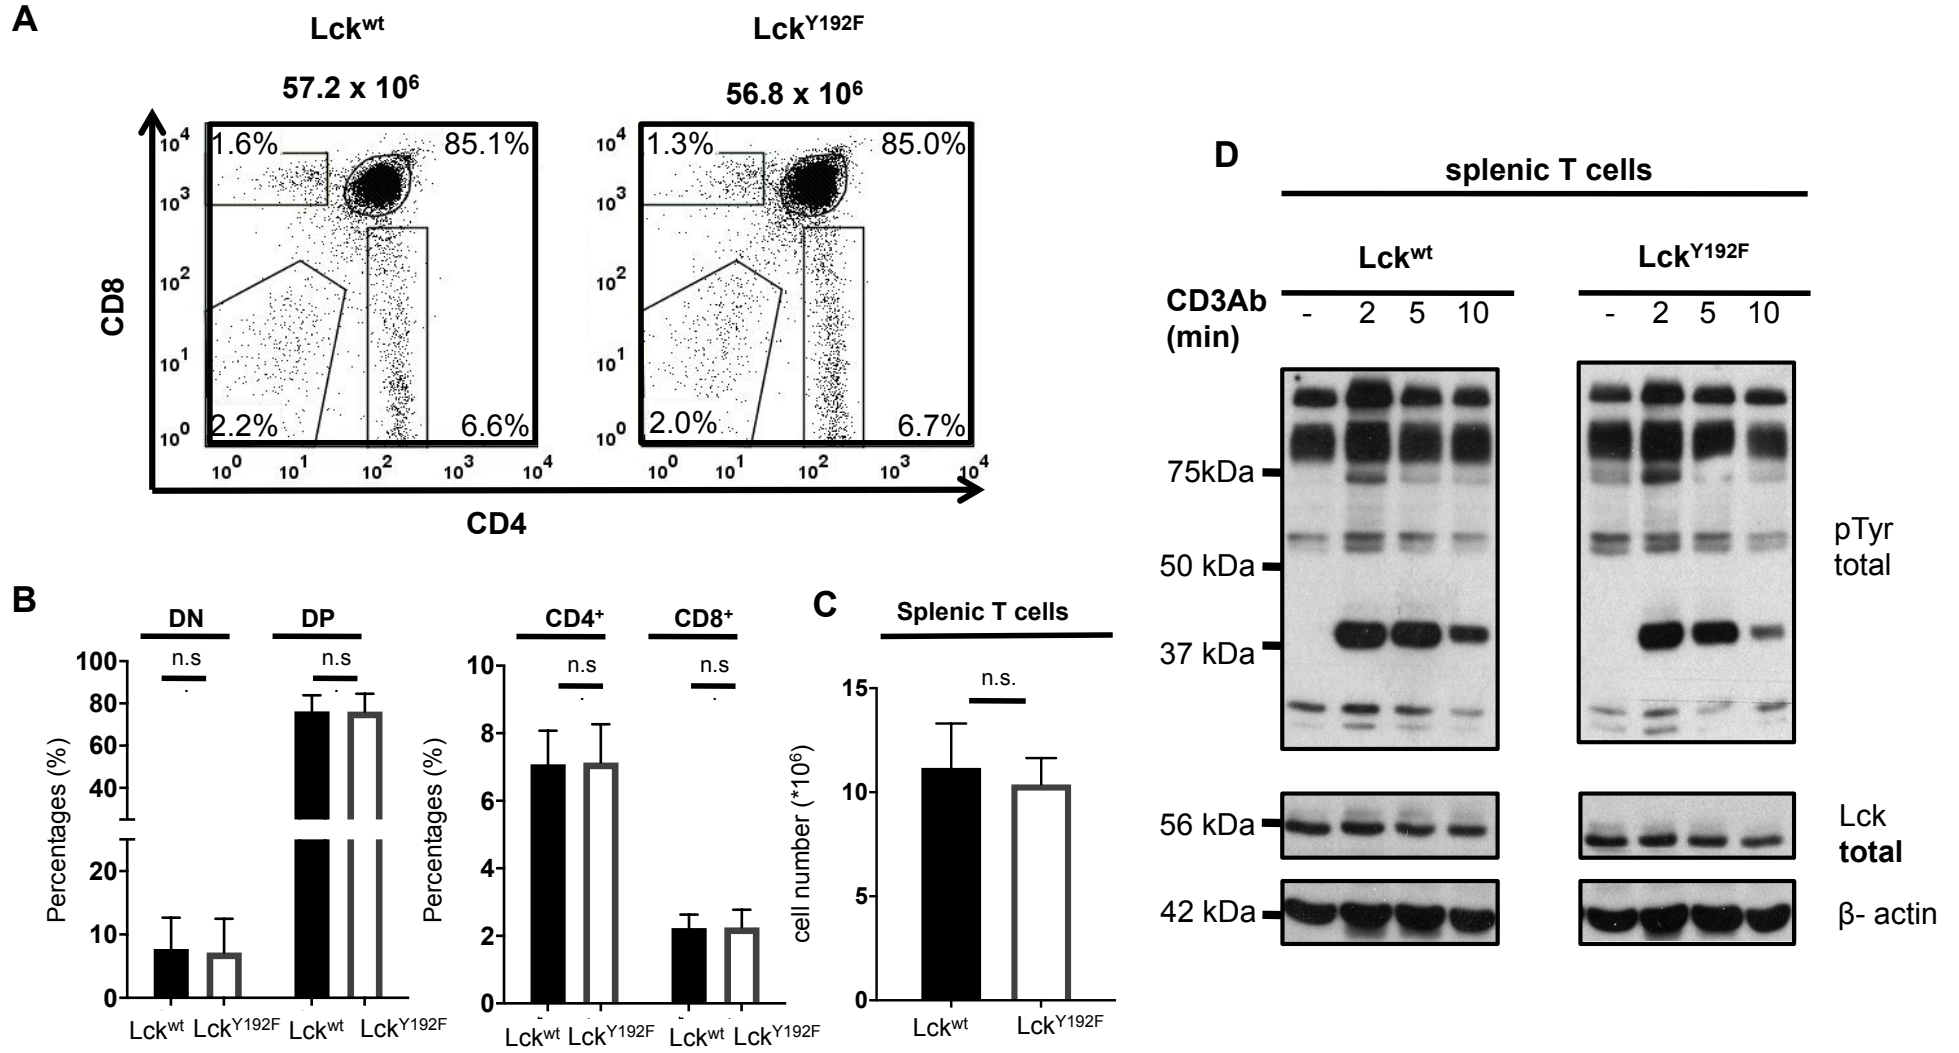

**Fig. S2:**

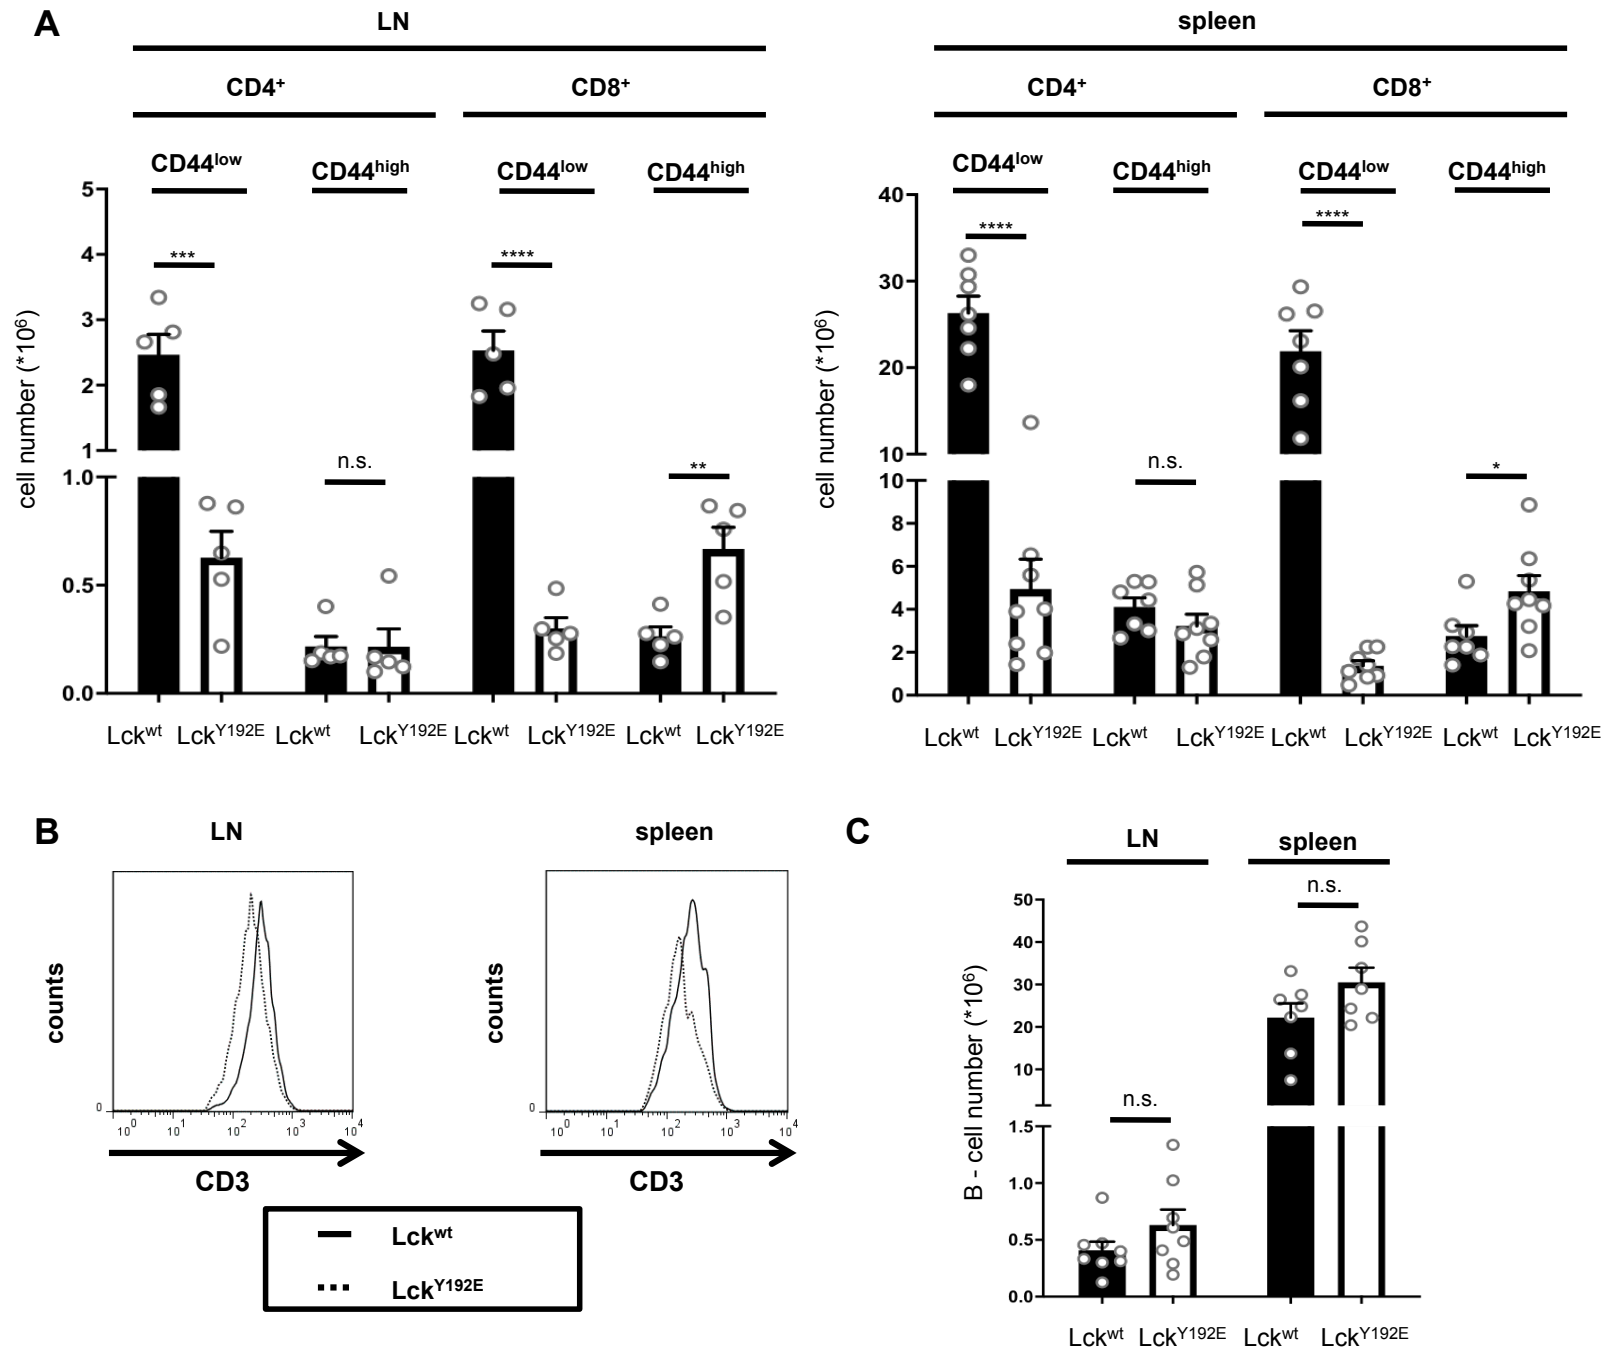

**Fig. S3:**

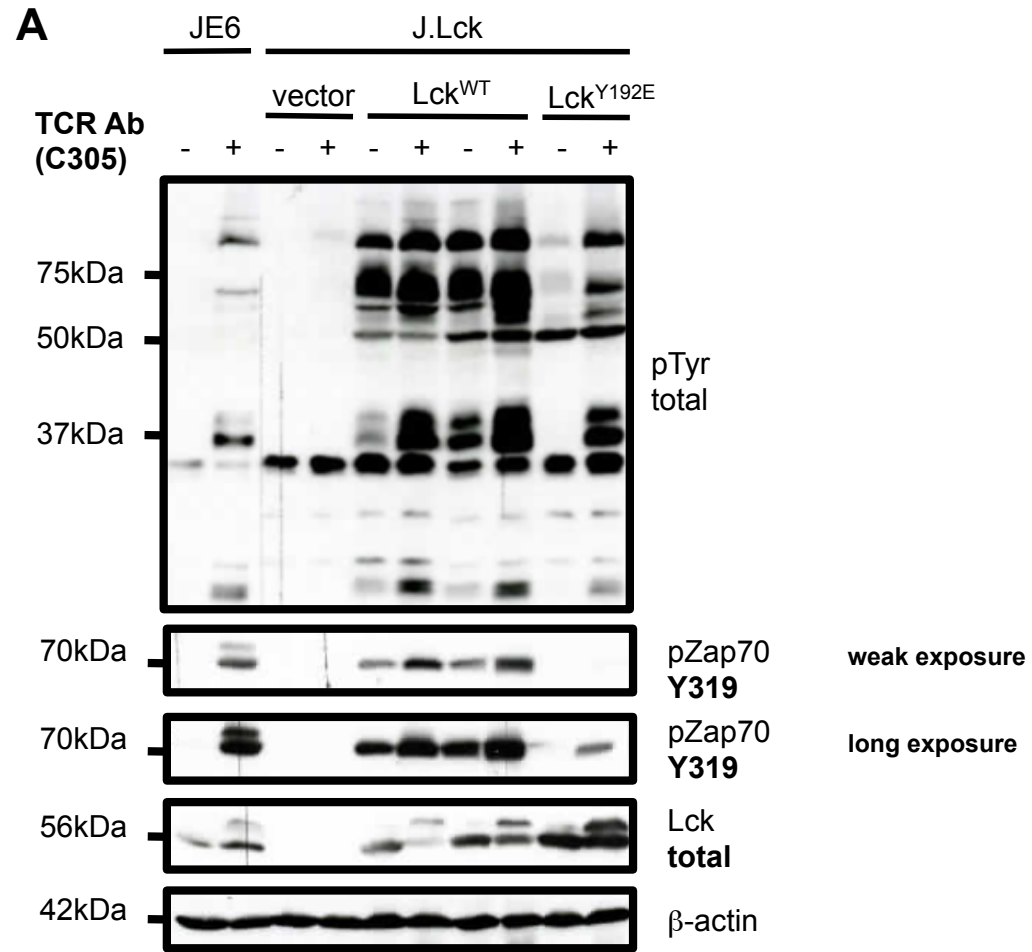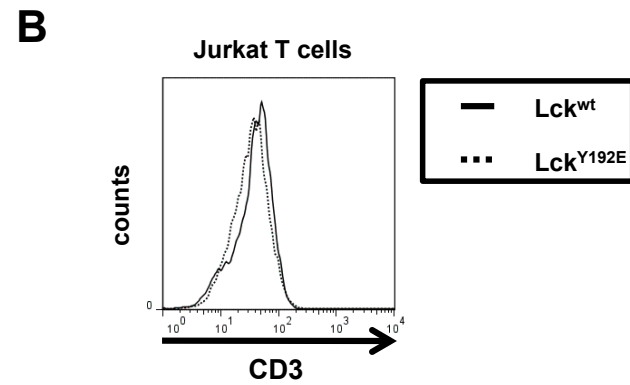

**Fig. S4:**

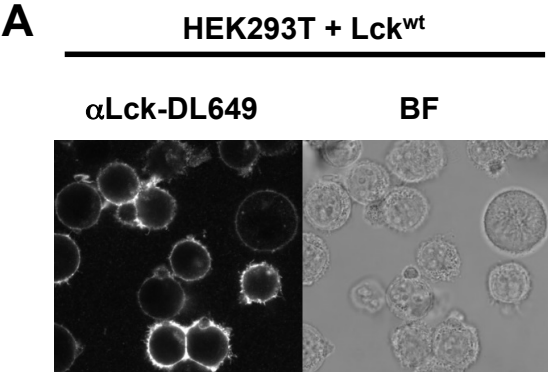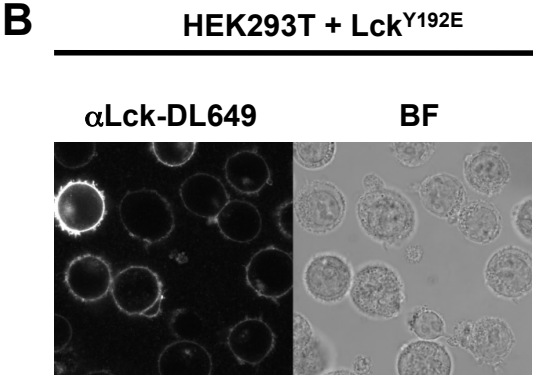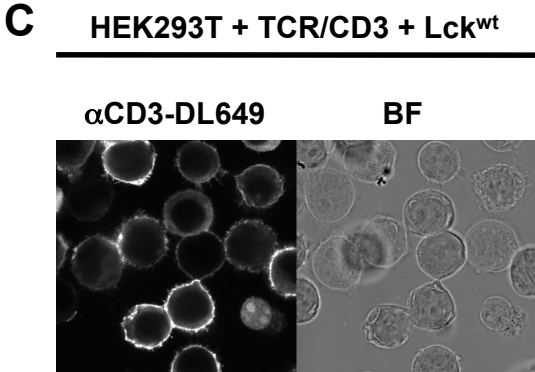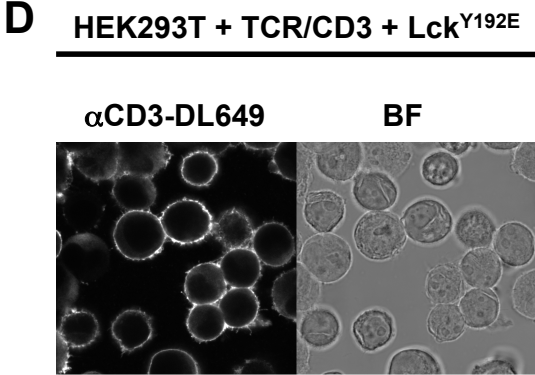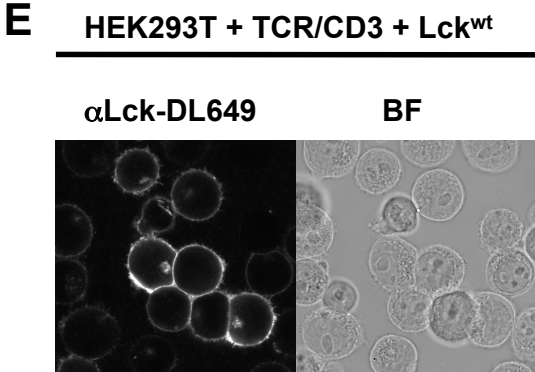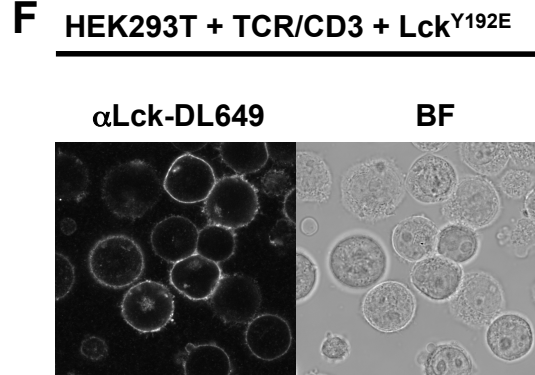

**Fig. S5:**

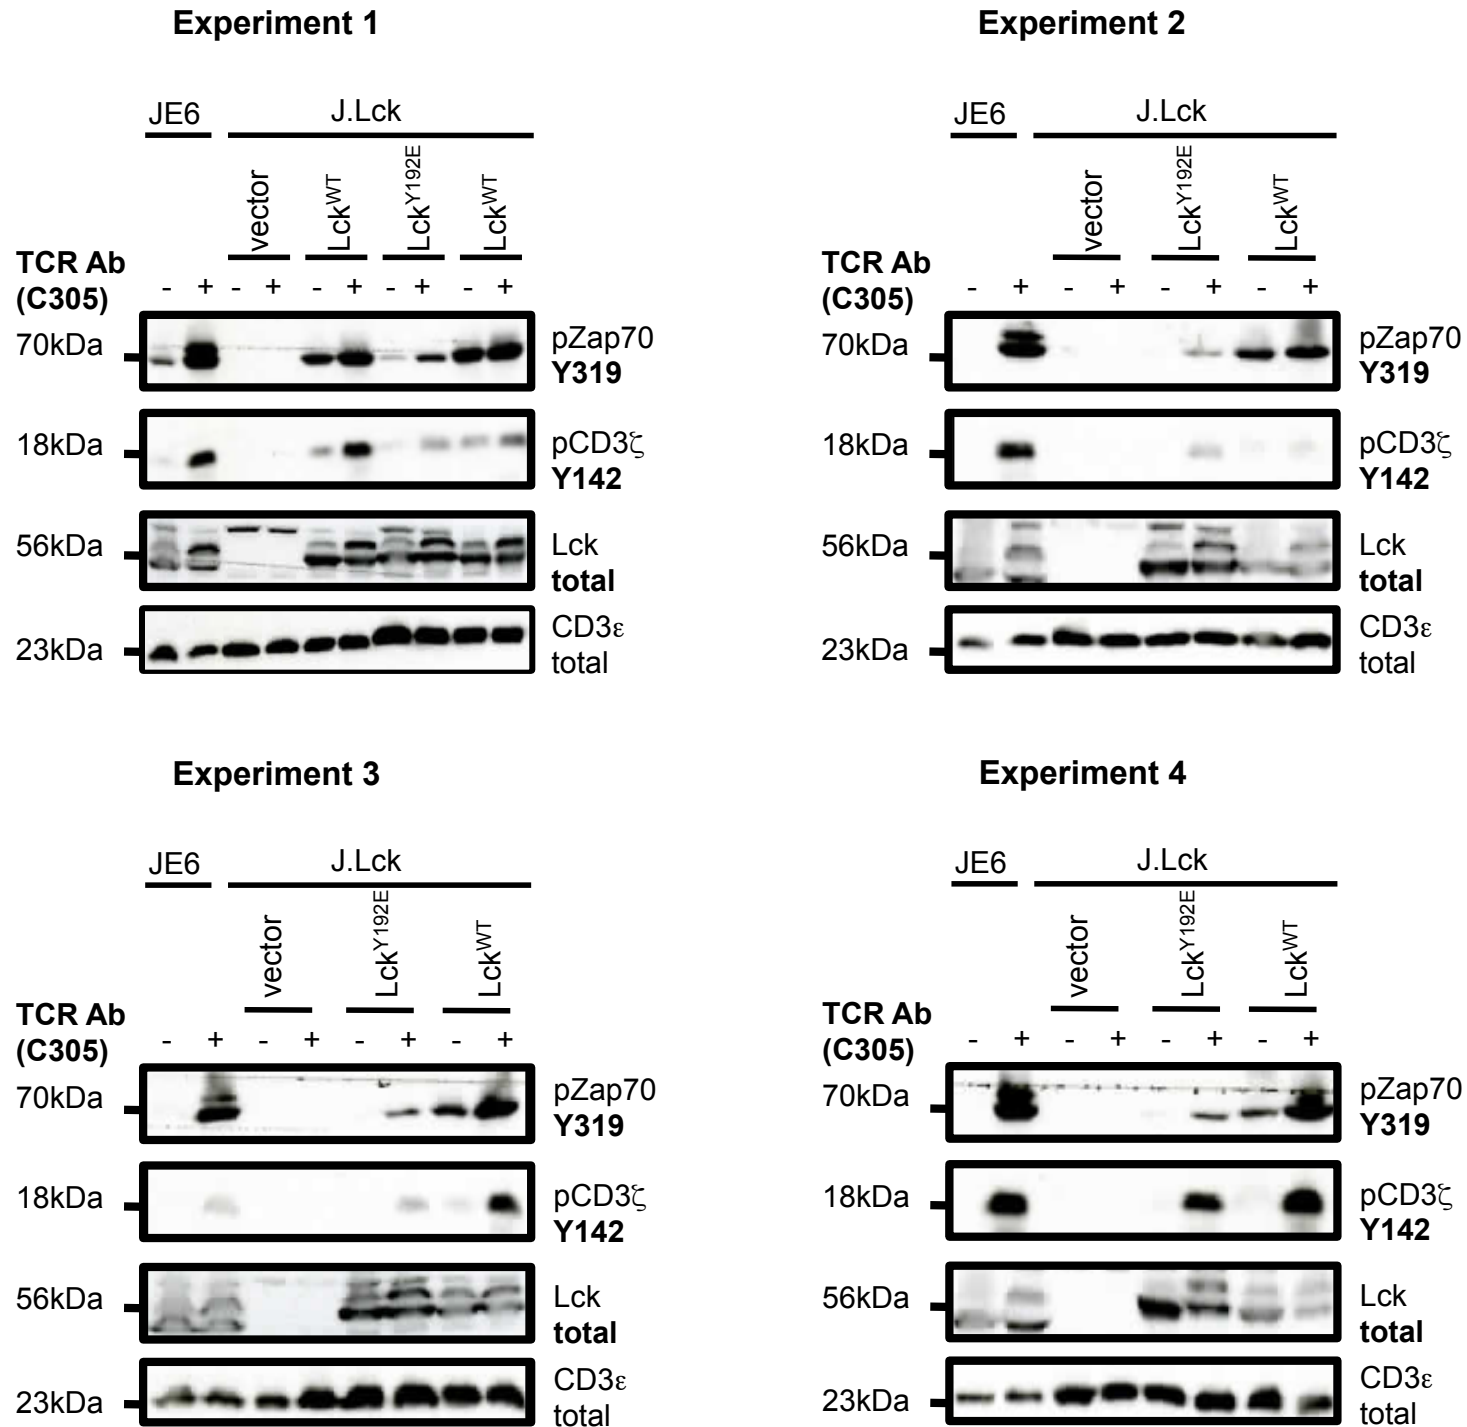

Supplement: 12964_2020_673_MOESM2_ESM.pdf [file 12964_2020_673_MOESM2_ESM.pdf]
